# Supplementary material
Source: MDPI journal article supplement (https://www.mdpi.com/2071-1050/14/22/14818)
Supplement: s1 [file s1]

**Table S1.** Calculations of both commuting energy expenditures used based on the code of the Compendium of Physical Activities for Adults, according to the mode of commuting to university.

| Code of the<br>Compendium for<br>EE p/m | Mode of commuting to university                |                                                                         |                                |
|-----------------------------------------|------------------------------------------------|-------------------------------------------------------------------------|--------------------------------|
|                                         | Active                                         | Public                                                                  | Private                        |
| 17151                                   | 2.0 METs (less than 3.0 km/hr)                 | (1.3 METs × time to commuting) + (7.5* × 2.5 METs*) / time to commuting | 1.3 METs                       |
| 171152                                  | 2.8 METs (3.0 to 3.9 km/hr)                    |                                                                         |                                |
| 17170)                                  | 3.0 METs (4.0 to 4.49 km/hr)                   |                                                                         |                                |
| 17170 + 17200                           | 3.65 METs (4.5 to 5.49 km/hr)                  |                                                                         |                                |
| 17200                                   | 4.3 METs (5.5 to 6.49 km/hr)                   |                                                                         |                                |
| 17220                                   | 5 METs (6.5 to 6.9 km/hr)                      |                                                                         |                                |
| 17230                                   | 7 METs (7 to 8.49 km/hr)                       |                                                                         |                                |
| 17231                                   | 8.3 METs (≥ 8.5 km/hr)                         |                                                                         |                                |
| <b>Calculated</b>                       |                                                |                                                                         |                                |
| Total EE                                | (METs according to EE p/m × time to commuting) | (1.3 METs × time to commuting) + (7.5* × 2.5 METs*)                     | (1.3 METs × time to commuting) |

Notes: EE = Energy expenditure; p/m = per min; PA = physical activity km/hr = kilometres/hours; \* = minutes added per trip; \* = code 17161 walking to the stations and stops.

**Table S2.** Associations between self-reported variables of commuting behaviours to university and device-measured time of PA, and sedentary behaviour.

|                                                       | Commuting behaviours to university           |                                              |                                  |                                   |                                              |                                              |                                     |                                  |                                   |                                              |                                              |                                              |                                  |                                   |                                              |
|-------------------------------------------------------|----------------------------------------------|----------------------------------------------|----------------------------------|-----------------------------------|----------------------------------------------|----------------------------------------------|-------------------------------------|----------------------------------|-----------------------------------|----------------------------------------------|----------------------------------------------|----------------------------------------------|----------------------------------|-----------------------------------|----------------------------------------------|
|                                                       | Active                                       |                                              |                                  |                                   |                                              | Public                                       |                                     |                                  |                                   |                                              | Private                                      |                                              |                                  |                                   |                                              |
|                                                       | Time<br><i>Beta</i><br>(95% CI)              | Distance<br><i>Beta</i><br>(95% CI)          | Speed<br><i>Beta</i><br>(95% CI) | EE p/m<br><i>Beta</i><br>(95% CI) | EE<br><i>Beta</i><br>(95% CI)                | Time<br><i>Beta</i><br>(95% CI)              | Distance<br><i>Beta</i><br>(95% CI) | Speed<br><i>Beta</i><br>(95% CI) | EE p/m<br><i>Beta</i><br>(95% CI) | EE<br><i>Beta</i><br>(95% CI)                | Time<br><i>Beta</i><br>(95% CI)              | Distance<br><i>Beta</i><br>(95% CI)          | Speed<br><i>Beta</i><br>(95% CI) | EE p/m<br><i>Beta</i><br>(95% CI) | EE<br><i>Beta</i><br>(95% CI)                |
| <b>Commuting<br/>-related PA<br/>and SB<br/>(min)</b> |                                              |                                              |                                  |                                   |                                              |                                              |                                     |                                  |                                   |                                              |                                              |                                              |                                  |                                   |                                              |
| <i>MVPA</i>                                           | <b>0.08</b><br><b>(0.04,</b><br><b>1.25)</b> | <b>0.01</b><br><b>(0.00,</b><br><b>0.02)</b> | -0.10<br>(-0.23,<br>0.02)        | -0.10<br>(-0.23,<br>0.02)         | <b>3.70</b><br><b>(1.98,</b><br><b>5.42)</b> | 0.17<br>(-1.45,<br>1.81)                     | -0.20<br>(-1.21,<br>0.81)           | -0.59<br>(-1.39,<br>0.20)        | -0.05<br>(-0.03,<br>0.01)         | 0.23<br>(-1.89,<br>2.35)                     | -0.08<br>(-1.12,<br>0.96)                    | -0.20<br>(-1.30,<br>0.90)                    | -0.08<br>(-1.92,<br>1.74)        | 0.00<br>(-0.00,<br>0.01)          | -0.10<br>(-1.46,<br>1.25)                    |
| <i>Moderate</i>                                       | <b>1.08</b><br><b>(0.70,</b><br><b>1.47)</b> | <b>0.07</b><br><b>(0.03,</b><br><b>0.11)</b> | -0.09<br>(-0.21,<br>0.02)        | -0.09<br>(-0.21,<br>0.02)         | <b>3.40</b><br><b>(1.74,</b><br><b>5.06)</b> | 0.15<br>(-1.59,<br>1.90)                     | -0.23<br>(-1.31,<br>0.84)           | -0.61<br>(-1.47,<br>0.23)        | -0.00<br>(-0.03,<br>0.02)         | 0.20<br>(-2.07,<br>2.47)                     | -0.07<br>(-1.12,<br>0.97)                    | -0.19<br>(-1.30,<br>0.90)                    | -0.09<br>(-1.93,<br>1.74)        | 0.00<br>(-0.00,<br>0.00)          | -0.09<br>(-1.45,<br>1.27)                    |
| <i>Light</i>                                          | 0.20<br>(-0.94,<br>1.35)                     | 0.30<br>(-0.06,<br>0.12)                     | 0.53<br>(-0.16,<br>0.27)         | -0.01<br>(-0.23,<br>0.20)         | 0.97<br>(-3.07,<br>5.02)                     | <b>1.67</b><br><b>(0.34,</b><br><b>2.99)</b> | 0.80<br>(-0.12,<br>1.73)            | 0.21<br>(-0.71,<br>1.14)         | -0.02<br>(-0.04,<br>0.00)         | <b>2.17</b><br><b>(0.45,</b><br><b>3.89)</b> | <b>1.35</b><br><b>(0.79,</b><br><b>1.92)</b> | <b>1.24</b><br><b>(0.59,</b><br><b>1.89)</b> | 0.43<br>(-0.87,<br>1.75)         | 0.00<br>(-0.00,<br>0.00)          | <b>1.76</b><br><b>(1.03,</b><br><b>2.49)</b> |
| <i>Sedentary</i>                                      | <b>0.44</b><br><b>(0.03,</b><br><b>0.86)</b> | <b>0.03</b><br><b>(0.00,</b><br><b>0.07)</b> | -8.90<br>(-0.09,<br>0.09)        | -0.01<br>(-0.09,<br>0.07)         | <b>1.64</b><br><b>(0.21,</b><br><b>3.08)</b> | 0.78<br>(-0.58,<br>2.14)                     | 0.05<br>(-0.16,<br>0.28)            | 0.21<br>(-0.56,<br>1.00)         | -0.01<br>(-0.03,<br>0.00)         | 1.01<br>(-0.76,<br>2.79)                     | <b>0.92</b><br><b>(0.70,</b><br><b>1.14)</b> | <b>0.68</b><br><b>(0.34,</b><br><b>1.03)</b> | 0.21<br>(-0.50,<br>0.92)         | 0.01<br>(-0.03,<br>0.05)          | <b>1.20</b><br><b>(0.91,</b><br><b>1.49)</b> |

Notes: EE = Energy expenditure; p/m = per min; Beta = Unstandardized Beta coefficient; 95% CI = 95% Confidence Intervals; PA = physical activity; SB = sedentary behaviour; MVPA = Moderate to vigorous physical activity; bold = Significant differences with  $p < 0.05$ .

**Table S3.** Associations between self-reported variables of commuting behaviours from university and device-measured time of PA, and sedentary behaviour.

|                                                       | Commuting behaviours from university           |                                                |                           |                           |                                                |                                                |                          |                           |                           |                                                |                                                |                                                |                           |                           |                                                |
|-------------------------------------------------------|------------------------------------------------|------------------------------------------------|---------------------------|---------------------------|------------------------------------------------|------------------------------------------------|--------------------------|---------------------------|---------------------------|------------------------------------------------|------------------------------------------------|------------------------------------------------|---------------------------|---------------------------|------------------------------------------------|
|                                                       | Active                                         |                                                |                           |                           |                                                | Public                                         |                          |                           |                           |                                                | Private                                        |                                                |                           |                           |                                                |
|                                                       | Time                                           | Distance                                       | Speed                     | EE p/m                    | EE                                             | Time                                           | Distance                 | Speed                     | EE p/m                    | EE                                             | Time                                           | Distance                                       | Speed                     | EE p/m                    | EE                                             |
|                                                       | <i>Beta</i><br>(95% CI)                        | <i>Beta</i><br>(95% CI)                        | <i>Beta</i><br>(95% CI)   | <i>Beta</i><br>(95% CI)   | <i>Beta</i><br>(95% CI)                        | <i>Beta</i><br>(95% CI)                        | <i>Beta</i><br>(95% CI)  | <i>Beta</i><br>(95% CI)   | <i>Beta</i><br>(95% CI)   | <i>Beta</i><br>(95% CI)                        | <i>Beta</i><br>(95% CI)                        | <i>Beta</i><br>(95% CI)                        | <i>Beta</i><br>(95% CI)   | <i>Beta</i><br>(95% CI)   | <i>Beta</i><br>(95% CI)                        |
| <b>Commuting<br/>-related PA<br/>and SB<br/>(min)</b> |                                                |                                                |                           |                           |                                                |                                                |                          |                           |                           |                                                |                                                |                                                |                           |                           |                                                |
| <i>MVPA</i>                                           | <b>0.87</b><br>( <b>0.41,</b><br><b>1.33</b> ) | <b>0.07</b><br>( <b>0.03,</b><br><b>0.10</b> ) | -0.05<br>(-0.17,<br>0.68) | -0.05<br>(-0.17,<br>0.06) | <b>3.16</b><br>( <b>1.47,</b><br><b>4.85</b> ) | 0.36<br>(-1.52,<br>2.25)                       | 0.08<br>(-1.06,<br>1.23) | -0.13<br>(-0.97,<br>0.71) | -0.00<br>(-0.01,<br>0.00) | 0.47<br>(-1.98,<br>2.93)                       | -0.02<br>(-1.00,<br>0.94)                      | -0.12<br>(-1.13,<br>0.88)                      | -0.30<br>(-2.16,<br>1.56) | 0.00<br>(-0.01,<br>0.01)  | -0.03<br>(-1.30,<br>1.23)                      |
| <i>Moderate</i>                                       | <b>0.91</b><br>( <b>0.46,</b><br><b>1.35</b> ) | <b>0.07</b><br>( <b>0.03,</b><br><b>0.11</b> ) | -0.04<br>(-0.16,<br>0.08) | -0.05<br>(-0.17,<br>0.07) | <b>3.35</b><br>( <b>1.75,</b><br><b>4.96</b> ) | 0.39<br>(-1.86,<br>2.65)                       | 0.07<br>(-1.30,<br>1.44) | -0.17<br>(-1.18,<br>0.83) | -0.00<br>(-0.01,<br>0.01) | 0.51<br>(-2.43,<br>3.45)                       | -0.02<br>(-1.00,<br>0.95)                      | -0.12<br>(-1.13,<br>0.88)                      | -0.30<br>(-2.17,<br>1.55) | 0.00<br>(-0.01,<br>0.01)  | -0.03<br>(-1.30,<br>1.23)                      |
| <i>Light</i>                                          | 0.60<br>(-0.02,<br>1.22)                       | <b>0.05</b><br>( <b>0.00,</b><br><b>0.10</b> ) | 0.02<br>(-0.11,<br>0.15)  | -0.01<br>(-0.14,<br>0.11) | <b>2.47</b><br>( <b>0.29,</b><br><b>4.65</b> ) | <b>1.67</b><br>( <b>0.30,</b><br><b>3.05</b> ) | 0.67<br>(-0.28,<br>1.63) | -0.03<br>(-0.80,<br>0.74) | -0.09<br>(-0.01,<br>0.00) | <b>2.18</b><br>( <b>0.39,</b><br><b>3.97</b> ) | <b>0.75</b><br>( <b>0.08,</b><br><b>1.43</b> ) | <b>0.89</b><br>( <b>0.21,</b><br><b>1.56</b> ) | 0.76<br>(-0.60,<br>2.13)  | 0.00<br>(-0.00,<br>0.01)  | <b>0.98</b><br>( <b>0.11,</b><br><b>1.85</b> ) |
| <i>Sedentary</i>                                      | 0.34<br>(-0.35,<br>0.71)                       | <b>0.34</b><br>( <b>0.00,</b><br><b>0.06</b> ) | 0.02<br>(-0.05,<br>0.10)  | 0.02<br>(-0.07,<br>0.08)  | <b>1.38</b><br>( <b>0.05,</b><br><b>2.71</b> ) | <b>0.93</b><br>( <b>0.70,</b><br><b>1.80</b> ) | 0.47<br>(-0.08,<br>1.03) | 0.06<br>(-0.40,<br>0.53)  | -0.07<br>(-0.01,<br>0.00) | <b>1.22</b><br>( <b>0.09,</b><br><b>2.34</b> ) | <b>1.01</b><br>( <b>0.68,</b><br><b>1.33</b> ) | <b>0.58</b><br>( <b>0.11,</b><br><b>1.05</b> ) | -0.19<br>(-1.15,<br>0.76) | -0.00<br>(-0.00,<br>0.00) | <b>1.31</b><br>( <b>0.89,</b><br><b>1.73</b> ) |

Notes: EE = Energy expenditure; p/m = per min; Beta = Unstandardized Beta coefficient; 95% CI = 95% Confidence Intervals; PA = physical activity; SB = sedentary behaviour; MVPA = Moderate to vigorous physical activity; bold = Significant differences with  $p < 0.05$ .
